# Supplementary material for: Psychological, Social, and Behavioral Conditions of Anti-VEGF Patients: Results from the ALBATROS Data Collection
Source: Preprints.org preprint supplement (doi:10.20944/preprints202311.0821.v1), 2023-11-13
Supplement: Supplementary file 1 [file supplementary]

Supplementary Materials:

**Figure S1**: Box-Whisker-Plot of worst eye visual acuity vs age group and sex at baseline. Note: Distribution of worst eye visual acuity (VA): Study eye=69.6%, Partner eye=30.4%. Horizontal lines show median, boxes indicate the interquartile range (IQR) with whiskers providing 1.5xIQR and black dots showing outlier values.


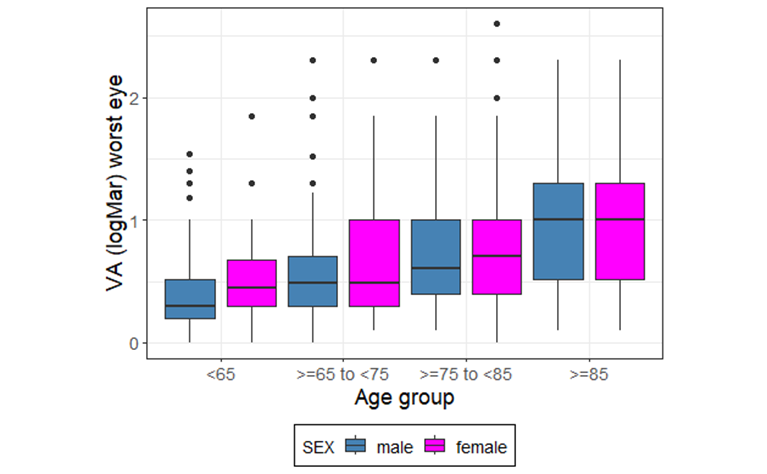


**Figure S2**: Heat maps showing correlation of disease- and treatment distress at baseline [A], final visit [B] and change from baseline to final visit [C] for the overall population. Numbers indicate patients with a distinct combination of distress perception. Shadings show frequencies. The darker the color, the higher the frequency.

| A | 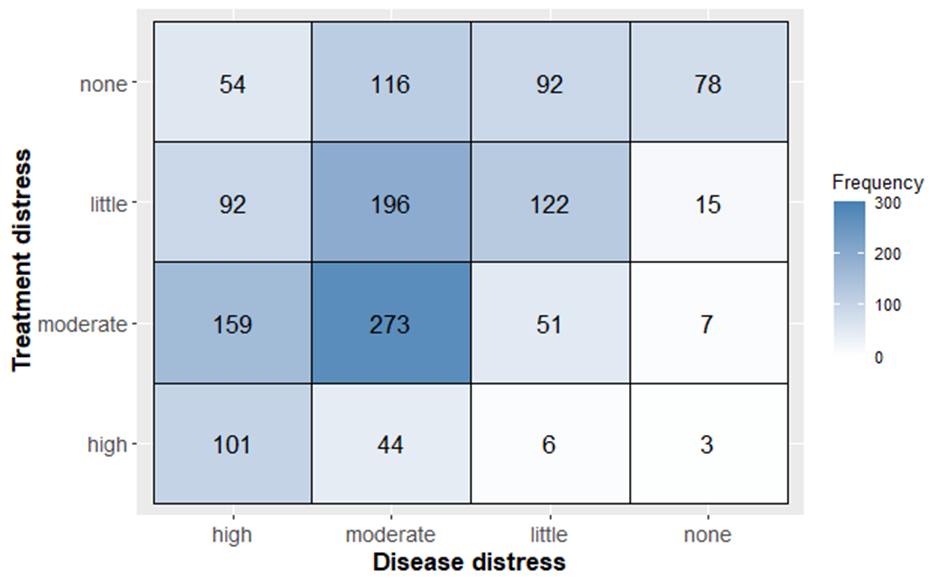 |
| --- | --- |
| B | 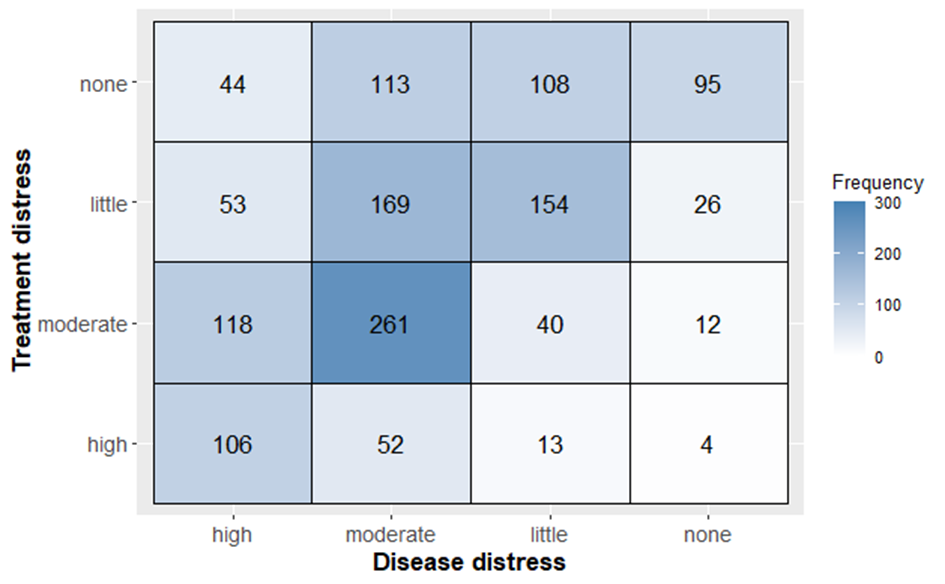 |
| C | 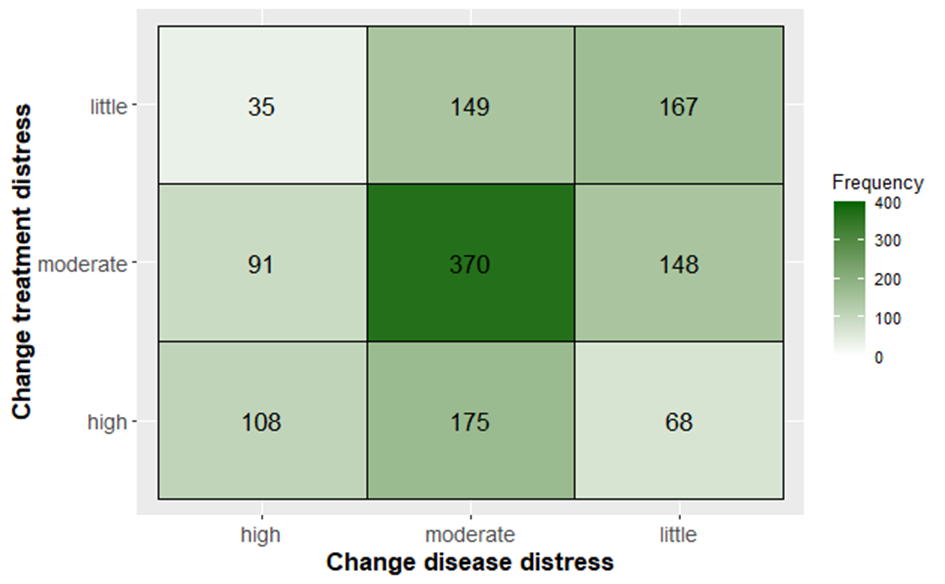 |
